# Supplementary material for: Genotype‐dependent changes of cell wall composition influence physiological traits of a long and a non‐long shelf‐life tomato genotypes under distinct water regimes
Source: PubMed Central journal article supplement — Plant J. 2022 Nov 10;112(6):1396–412. doi: 10.1111/tpj.16018 (PMC10098506; doi:10.1111/tpj.16018), 2022-11-10
Supplement: TPJ-112-1396-s002.pdf [file TPJ-112-1396-s002.pdf]

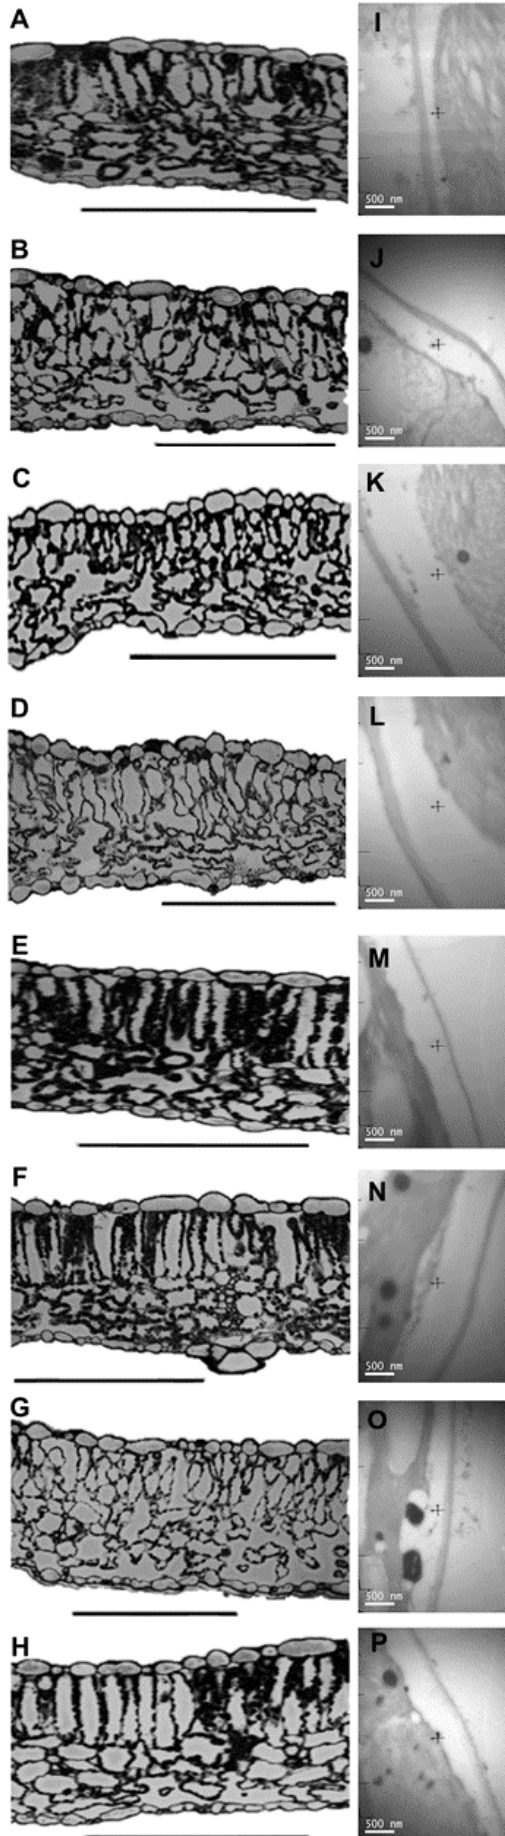

**Fig. S1.** Anatomical characteristics of the studied genotypes from semi-fine (left) and ultra-fine (right) cross sections taken at 200X and at 30000X magnifications, respectively. From top to bottom, all pictures included in the four first lines represent nLSL genotype particularities, whereas the last four lines show LSL genotype traits. CL conditions correspond to A, I and E, M; ST 40% FC to B, J and F, N; ST 30% FC to C, K and G, O; ST 30% FC-Rec to D, L and H, P. Black scale bars in semi-fine cross sections = 200  $\mu\text{m}$ . The detailed quantitative analyses of all studies anatomical parameters are shown in Tables 4 and 5.
